# Supplementary material for: Around the clock: unveiling giraffe rest-activity rhythms and social dynamics
Source: Frontiers journal article supplement (doi:10.3389/fcosc.2024.1462664), 2024-10-29
Supplement: Table_1.docx [file Table_1.docx]

**Mebus et al. (2024) Front. Conserv. Sci. 5:1462664**

Supplementary Table S1: Percentage of individual behaviors in the three observation phases

|  |  | Day | | | Night | | |
| --- | --- | --- | --- | --- | --- | --- | --- |
|  | F1 | F2 | F3 | F1 | F2 | F3 |
| Standing | B | 32.87  + 6.93 % | 24.89  + 4.24 % | 28.60  + 5.03 % | 11.29  + 1.89 % | 20.81  + 2.93 % | 18.36  + 2.88 % |
| I1 | 35.19  + 6.51 % | 29.39  + 5.55 % | 32.76  + 6.56 % | 13.44  + 1.29 % | 24.83  + 3.22 % | 20.18  + 3.00 % |
| I2 | 53.47  + 6.33 % | 50.56  + 6.00 % | 42.47  + 4.62 % | 13.49  + 2.65 % | 17.73  + 2.18 % | 16.23  + 2.48 % |
| Feeding | B | 42.07  + 8.87 % | 41.93  + 7.96 % | 39.97  + 7.42 % | 38.04  + 2.67 % | 19.80  + 1.60 % | 29.87  + 1.50 % |
| I1 | 26.98  + 6.37 % | 22.94  + 3.93 % | 26.29  + 4.85 % | 34.86  + 1.45 % | 16.85  + 2.07 % | 29.10  + 1.63 % |
| I2 | 23.84  + 4.92 % | 23.91  + 3.56 % | 26.80  + 4.11 % | 35.33  + 3.12 % | 16.90  + 1.55 % | 35.79  + 1.82 % |
| Locomotion | B | 5.86  + 0.87 % | 8.66  + 1.70 % | 11.41  + 1.93 % | 2.33  + 0.20 % | 4.19  + 1.07 % | 3.81  + 0.34 % |
| I1 | 5.25  + 0.74 % | 8.26  + 1.81 % | 10.43  + 2.26 % | 2.71  + 0.22 % | 4.55  + 0.47 % | 3.58  + 0.22 % |
| I2 | 6.76  + 0.99 % | 8.23  + 1.03 % | 12.06  + 1.95 % | 2.67  + 0.36 % | 3.60  + 0.41 % | 3.41  + 0.30 % |
| Lying | B | 0  + 0 % | 4.50  + 2.24 % | 0  + 0 % | 47.03  + 1.73 % | 54.61  + 3.88 % | 46.99  + 2.09 % |
| I1 | 3.56  + 2.27 % | 9.59  + 3.59 % | 1.65  + 1.65 % | 45.84  + 1.66 % | 51.45  + 2.27 % | 45.24  + 2.54 % |
| I2 | 0.51  + 0.33 % | 4.70  + 1.96 % | 4.70  + 1.40 % | 45.51  + 2.10 % | 60.59  + 1.43 % | 43.11  + 2.75 % |
| Sleeping | B | 0  + 0 % | 0  + 0 % | 0  + 0 % | 1.16  + 0.38 % | 0.46  + 0.16 % | 0.81  + 0.16 % |
| I1 | 0  + 0 % | 0  + 0 % | 0  + 0 % | 2.38  + 0.43 % | 1.35  + 0.20 % | 0.91  + 0.24 % |
| I2 | 0  + 0 % | 0  + 0 % | 0  + 0 % | 2.89  + 0.48 % | 1.03  + 0.27 % | 1.30  + 0.26 % |
| Out | B | 19.17  + 12.39 % | 19.97  + 12.78 % | 19.94  + 12.58 % | 0.16  + 0.16 % | 0.14  + 0.14 % | 0.14  + 0.14 % |
| I1 | 29.10  + 12.86 % | 29.81  + 12.95 % | 28.83  + 13.11 % | 0.94  + 0.90 % | 0.94  + 0.90 % | 0.94  + 0.90 % |
| I2 | 15.4  + 10.12 % | 12.57  + 10.39 % | 13.97  + 10.27 % | 0.14  + 0.10 % | 0.14  + 0.10 % | 0.14  + 0.10 % |
